# Supplementary material
Source: PubMed Central journal article supplement (PMC6704477)
Supplement: NIHMS1045221-supplement-MMC1.pdf [file NIHMS1045221-supplement-MMC1.pdf]

# **Impaired endothelial autophagy promotes liver fibrosis by aggravating the oxidative stress response during acute liver injury**

Maria Ruart, Laia Chavarria, Genís Campreciós, Nuria Suárez-Herrera, Carla Montironi, Sergi Guixé-Muntet, Jaume Bosch, Scott L. Friedman, Juan Carlos Garcia-Pagán, Virginia Hernández-Gea

## Table of contents

|                              |   |
|------------------------------|---|
| Supplementary materials..... | 2 |
| Fig. S1.....                 | 4 |
| Fig. S2.....                 | 5 |
| Fig. S3.....                 | 6 |
| Fig. S4.....                 | 7 |
| Fig. S5.....                 | 7 |
| Fig. S6.....                 | 8 |
| Fig. S7.....                 | 9 |

## Supplementary materials

### Antibodies

| Name                          | Supplier           | Cat no.      | Clone no. |
|-------------------------------|--------------------|--------------|-----------|
| SQSTM1/p62                    | Cell Signalling    | #5114        |           |
| LC3B                          | Cell Signalling    | #2775        |           |
| ATG7                          | Cell signaling     | #2631        |           |
| $\alpha$ -SMA                 | Sigma              | #A2547       | 1A4       |
| PDGFR- $\beta$                | Santa Cruz         | #sc-1627     |           |
| total eNOS                    | BD Bioscience      | #610297      | Clone 3   |
| phosphorylated eNOS (Ser1177) | Cell signalling    | #9571        |           |
| HO-1                          | Enzo Life Sciences | #ADI-SPA-896 |           |
| NQO1                          | Abcam              | #ab2346      |           |
| GAPDH                         | Santa Cruz         | #sc-32233    | 6C5       |
| $\beta$ -actin                | Sigma              | #A2228       | AC-74     |
| $\alpha$ SMA                  | Abcam              | #ab5694      |           |
| Von Willebrand Factor (VWF)   | Dako               | #A0082       |           |
| Desmin                        | Dako               | #M0760       | D33       |
| LAMP-2                        | Santa Cruz         | #sc-34245    |           |

### Cell lines

| Name                                           | Citation                                                                                                                                                        | Supplier   | Cat no. | Passage no. |
|------------------------------------------------|-----------------------------------------------------------------------------------------------------------------------------------------------------------------|------------|---------|-------------|
| Human Umbilical Vein Endothelial Cells (HUVEC) |                                                                                                                                                                 | Lonza      | CC-2517 | Below 12    |
| Mouse liver sinusoidal endothelial cells TSEC  | Huebert, R. C. et al. Immortalized liver endothelial cells: a cell culture model for studies of motility and angiogenesis. Lab. Investig. 90, 1770–1781 (2010). | Dr. V Shah |         | Below 20    |

### Organisms

| Name | Supplier               | Strain              | Sex           | Age         | Overall n number |
|------|------------------------|---------------------|---------------|-------------|------------------|
| Mice | The Jackson Laboratory | C57BL/6             | Male & female | 10-14 weeks | 81               |
| Rats | Charles River          | Sprague-Dawley (SD) | Male          | 250-300 g   | 36               |

### Sequence based reagents

|             |               |  |
|-------------|---------------|--|
| Taqman Atg7 | Mm00512209_m1 |  |
|-------------|---------------|--|

|                  |               |                         |
|------------------|---------------|-------------------------|
| Taqman<br>VEGFR2 | Mm01222421_m1 | Rn00564986_m1           |
| Taqman ET-1      | Mm00438656_m1 | Rn00561129_m1           |
| Taqman GAPDH     | Mm99999915_g1 | Rn01775763_g1           |
| Acta2            | ACTA2_2_Fw    | CTTCGTGACTACTGCCGAGC    |
|                  | ACTA2_2_Rv    | AGGTGGTTTCGTGGATGCC     |
| P62              | p62-Fw        | TTCGGAAGTCAGCAAACCTGA   |
|                  | p62-Rv        | CCGACTCCATCTGTTCTCTG    |
| GPx1             | GPx1_Fw       | TCGGTTTCCCGTGCAATCA     |
|                  | GPx1_Rv       | GTCGGACGTACTTGAGGGAA    |
| GPx4             | GPx4_Fw       | TTACGAATCCTGGCCTTCCC    |
|                  | GPx4_Rv       | TAGCCGGCTGCAAACCTCC     |
| SOD1             | SOD1_Fw       | CTCACTCTCAGGAGAGCATTCC  |
|                  | SOD1_Rv       | TTCCACCTTTGCCCAAGTCA    |
| SOD2             | SOD2_Fw       | AAGGAGCAAGGTCGCTTACA    |
|                  | SOD2_Rv       | AATCCCCAGCAGCGGAATAA    |
| CAT              | CAT_Fw        | GGGATCTTGTGGGAAACAACAC  |
|                  | CAT_Rv        | CTGTGGGTTTCTCTTCTGGCTA  |
| Nrf2             | Nrf2_Fw       | AGTGGATCCGCCAGCTAC      |
|                  | Nrf2_Rv       | CTCTGCCAAAAGCTGCATACA   |
| Srxn1            | Srxn1_Fw      | GCACAACGTACCAATCGCC     |
|                  | Srxn1_Rv      | CAGGGTCCGCCAGGATCG      |
| Nqo1             | Nqo1_Fw       | TCTCTGGCCGATTCAGAGTG    |
|                  | Nqo1_Rv       | CCAGACGGTTTCCAGACGTT    |
| Gclc             | Gclc_Fw       | CTGCTGTCCCAAGGCTCG      |
|                  | Gclc_Rv       | TGTACTCCACCTCGTCACCC    |
| Gclm             | Gclm_Fw       | TGGGCACAGGTAAAACCCAA    |
|                  | Gclm_Rv       | CTGGGCTTCAATGTCAGGGA    |
| Gstm1            | Gstm1_Fw      | CCGTGCAGACATTGTGGAGA    |
|                  | Gstm1_Rv      | CTGCTTCTCAAAGTCAGGGTTG  |
| Gstm2            | Gstm2_Fw      | CAGCCCTGACTTTGAGAAAAAGA |
|                  | Gstm2_Rv      | GACCTTGTTCCCTGCAAACCA   |
| Gapdh            | GAPDH_Fw      | AGACGGCCGCATCTTCTT      |
|                  | GAPDH_Rv      | TTCACACCGACCTTCACCAT    |

## Software

| Software name    | Manufacturer                    | Version |
|------------------|---------------------------------|---------|
| SPSS for Windows | IBM                             | 23.0    |
| Prism            | GraphPad                        | 5.01    |
| ImageJ           | US National Institute of Health | 1.51j8  |
| SDS              | Applied Biosystems              | 2.3     |
| MultiGauge       | Fujifilm                        | 2.1     |

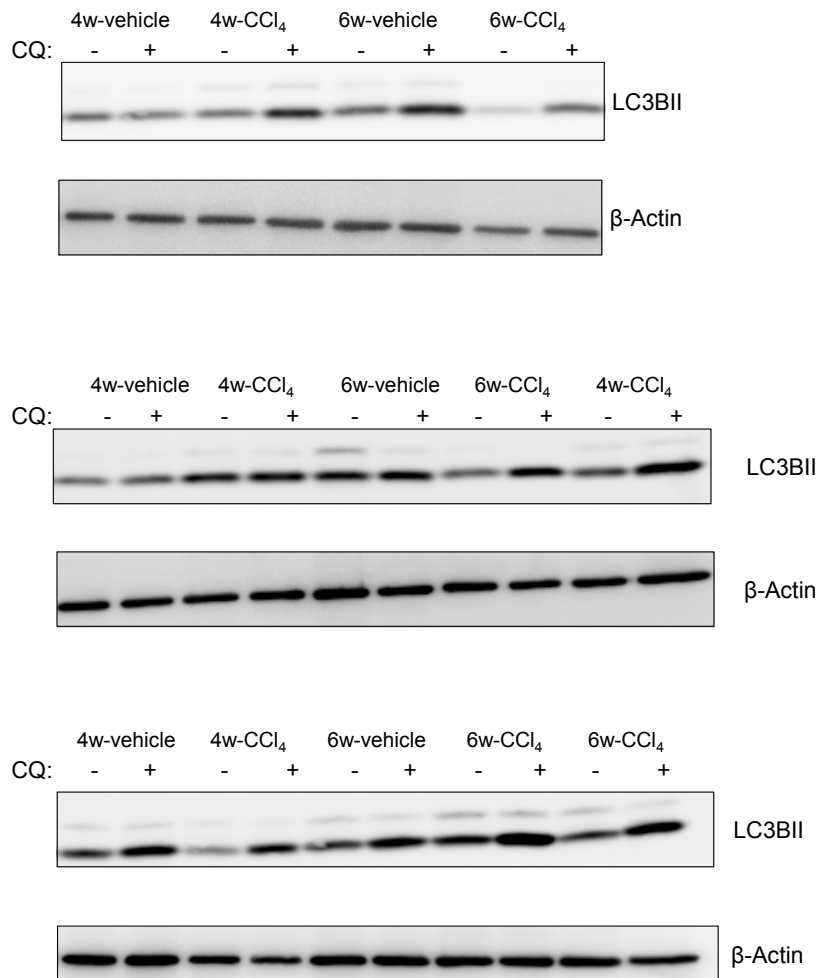

**Fig. S1. Autophagy is upregulated during *in vivo* capillarization:** Primary LSEC isolated from rats treated with CCl<sub>4</sub> or vehicle for 4 and 6 weeks, directly plated and stabilized for 2h. For autophagy flux assay by western blot cells were treated with CQ during 2h and collected thereafter. All membranes of LC3B II immunoblotting with and without addition of CQ showing autophagy flux displaying an increase at 4 weeks and incapability of further increase at 6 weeks. Protein expressions are expressed as fold change relative to control (\*P≤0.05, \*\*P≤0.01, \*\*\*P≤0.001, Student's t-test or analysis of variance (ANOVA)).

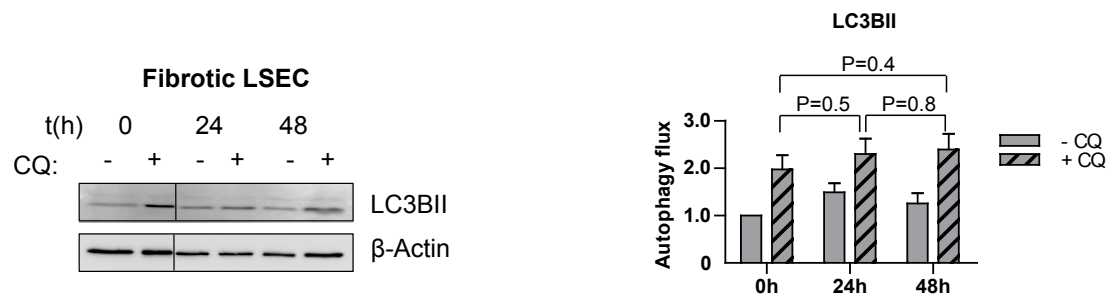

**Fig. S2. Fibrotic LSEC are unable to further increase autophagy levels during *in vitro* capillarization.** Primary LSEC isolated from rats treated with CCl<sub>4</sub> for 4 weeks and culture in plastic during 24 and 48 h. LC3B II immunoblotting with and without addition of CQ showing inability to increase autophagy flux during plastic culture. Data shows mean value ± SEM of at least 3 experiments. Protein expression is expressed as fold change relative to control (\*P≤0.05, \*\*P≤0.01, \*\*\*P≤0.001, Student's t-test).

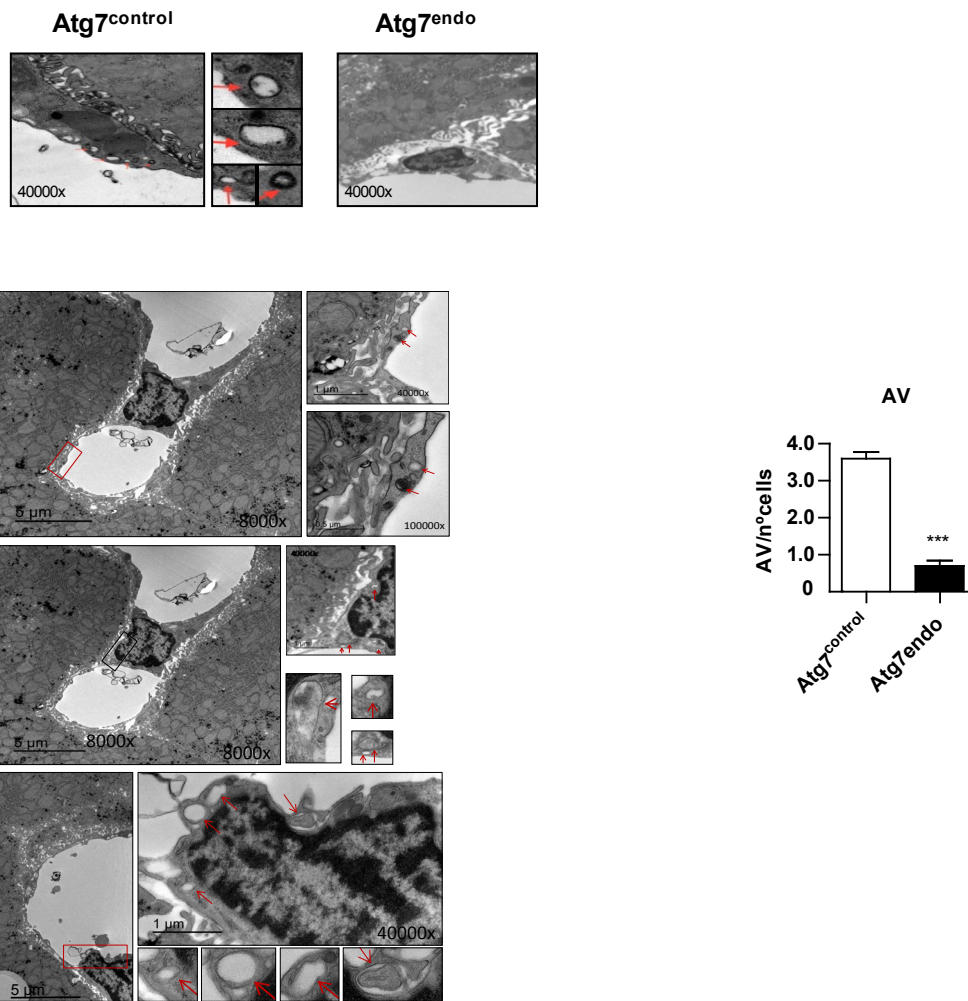

**Fig. S3. Generation of Atg7<sup>endo</sup> mice.** Representative whole liver electron micrographs from Atg7<sup>endo</sup> and ATG7<sup>control</sup> mice showing autophagic vacuoles (AV) in LSEC and its quantification, illustrating a significant decrease of AV in transgenic animal.

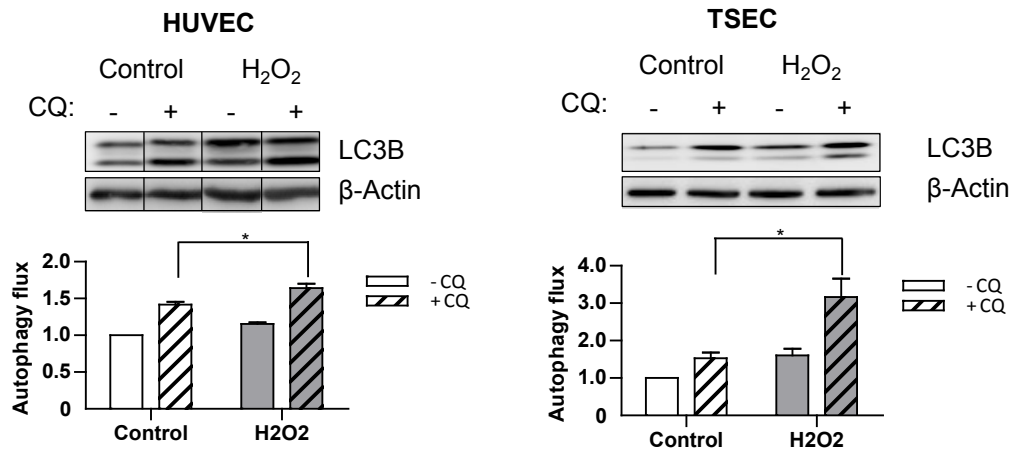

**Fig. S4. Oxidative stress triggers autophagy.** LC3B II immunoblotting with and without addition of CQ showing autophagy flux in HUVEC (left) and in TSEC (right) after H<sub>2</sub>O<sub>2</sub> treatment during 72 h. Data shows mean value ± SEM of at least 3 experiments. Protein expression is expressed as fold change relative to control (\*P≤0.05, \*\*P≤0.01, \*\*\*P≤0.001, Student's t-test).

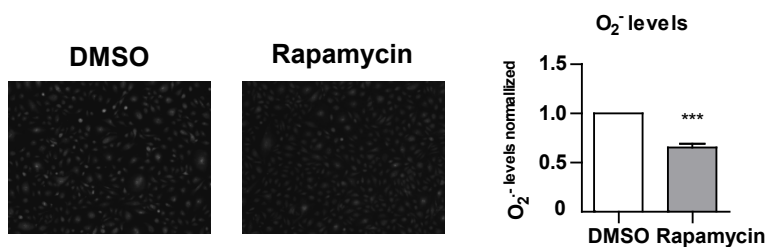

**Fig. S5. Increasing endothelial autophagy alleviates oxidative stress:** HUVEC cells were treated with Rapamycin for 24 h (autophagic enhancer) and H<sub>2</sub>O<sub>2</sub> was added later during 15 h. Cellular superoxide content was then measured by dihydroethidium showing a significant decrease in O<sub>2</sub><sup>-</sup> levels. Data shows mean value ± SEM of at least 3 experiments (\*P≤0.05, \*\*P≤0.01, \*\*\*P≤0.001, Student's t-test).

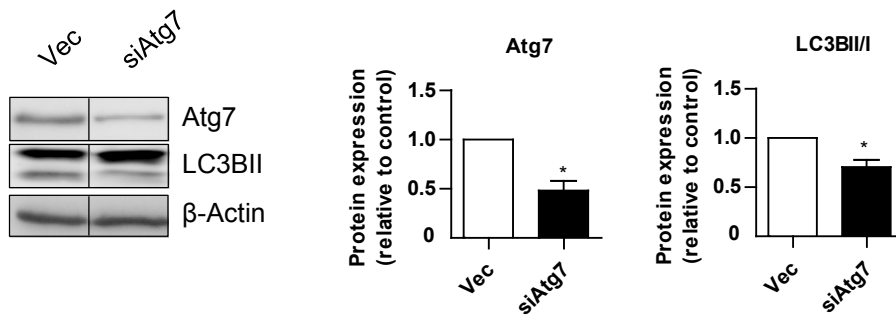

**Fig. S6. Knockdown of Atg7 in TSEC.** TSEC were transduced with siAtg7 or empty vector (VEC). Immunoblots for Atg7 and LC3B II and their quantification, showing a decrease expression in ATG7 protein and autophagy levels measured as the LC3II/I ratio. Data shows mean value  $\pm$  SEM of at least 3 experiments. Protein expression is expressed as fold change relative to control (\* $P \leq 0.05$ , \*\* $P \leq 0.01$ , \*\*\* $P \leq 0.001$ , Student's t-test).



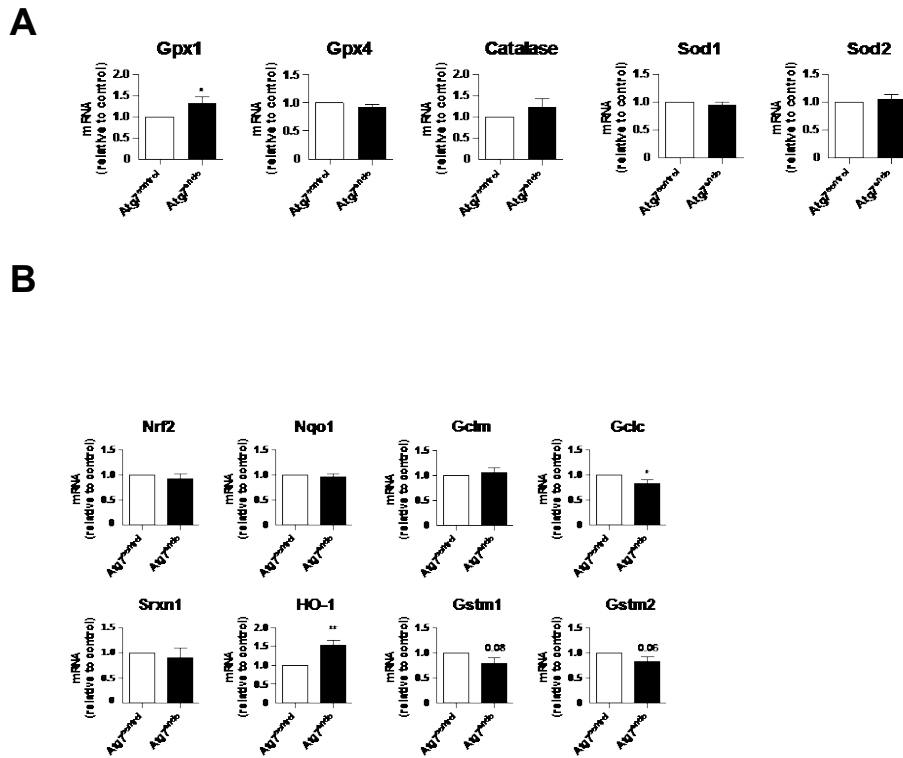

**Fig. S7. The classical antioxidant response in whole liver is insufficient to alleviate the accumulation of oxidative stress in *Atg7<sup>endo</sup>* mice.** *Atg7<sup>endo</sup>* and *Atg7<sup>control</sup>* mice were treated every other day with CCl<sub>4</sub> i.p. for 1 week to induce mild acute liver injury. (A) mRNA changes (qRT-PCR analysis) showing not significant changes in the classical genes that protect against oxidative stress Gpx1, Gpx4, Sod1, Sod2 and catalase and (B) mRNA changes (qRT-PCR analysis) of the Nrf2-dependent antioxidative stress genes Srxn, Nqo1, Gclc, Gclm, and Gstm2. Data shows mean value  $\pm$  SEM of at least 3 experiments. mRNA expression is expressed as fold change relative to control (\* $P \leq 0.05$ , \*\* $P \leq 0.01$ , \*\*\* $P \leq 0.001$ , Student's t-test).
